# Supplementary material for: Mutational Diversity in the Quinolone Resistance-Determining Regions of Type-II Topoisomerases of Salmonella Serovars
Source: MDPI journal article supplement (doi:10.3390/antibiotics10121455), 2021-11-26
Supplement: s1 [file s1]

**Table S1: Typhoidal *Salmonella***

| Serovar  | CIP <sup>r</sup> | GyrA               | GyrB      | ParC                 | ParE      | PMQR         | Efflux | MIC (mg/L) | Reference                                 |
|----------|------------------|--------------------|-----------|----------------------|-----------|--------------|--------|------------|-------------------------------------------|
| S. Typhi | S                | Asp82Asn           | -         | -                    | -         | -            | ND     | 0.03       | [76]                                      |
|          | I                | -                  | -         | Thr57Ser             | -         | -            | ND     | 0.125      | [76]                                      |
|          | R                | Ser83Phe           | -         | Thr57Ser             | -         | -            | No     | 1          | [87]                                      |
|          | R                | Ser83Tyr           | -         | Thr57Ser             | -         | -            | No     | 2          | [87]                                      |
|          | I-R              | Ser83Tyr           | -         | Gly72Ser             | -         | -            | No     | 0.25-0.38  | [78]                                      |
|          | I – R            | Ser83Phe           | -         | -                    | -         | -            | No/ND  | 0.19-6     | [23, 34, 72, 74, 75, 76, 78, 85, 87, 100] |
|          | R                | Ser83Phe           | -         | -                    | -         | <i>qnrB2</i> | ND     | 1          | [79]                                      |
|          | R                | Ser83Phe           | -         | -                    | -         | <i>qnrS1</i> | ND     | 1-2        | [102]                                     |
|          | R                | Ser83Phe           | -         | Glu84Lys             | ND        | <i>qnrB</i>  | No     | >32        | [78]                                      |
|          |                  | Ser83Phe           |           | Glu84Lys             | ND        | -            | No     | 0.38->32   | [78]                                      |
|          | I                | Ser83Leu           | -         | -                    | -         | -            | ND     | 0.38-0.5   | [34]                                      |
|          | R                | Ser83Leu Asp87Asn  | -         | Ser80Ile             | -         |              | Yes    | 4          | [87]                                      |
|          | I                | Ser83Tyr           | -         | -                    | -         | -            | No/ND  | 0.25-0.5   | [34, 72, 74, 78, 85, 87, 95]              |
|          | R                | Ser83Tyr           | -         | -                    | -         | <i>qnrS1</i> | Yes    | 4          | [82, 85]                                  |
|          | S – I            | Asp87Asn           | -         | -                    | -         | -            | No/ND  | 0.06-0.5   | [72, 74, 85, 95]                          |
|          | S – I            | Asp87Gly           | -         | -                    | -         | -            | ND     | 0.06-0.5   | [72]                                      |
|          | R                | Asp87Tyr           | -         | -                    | -         | <i>qnrS1</i> | ND     | 3          | [34]                                      |
|          | S                | Ser83Phe           | -         | -                    | Asp420Asn | -            | ND     | 0.06       | [72]                                      |
|          | I                | Ser83Tyr           | -         | -                    | Ser493Phe | -            | ND     | 0.38       | [76]                                      |
|          | R                | Ser83Phe Asp87Val  | -         | Ser80Ile             | -         | -            | ND     | >32        | [34, 86]                                  |
|          | I – R            | Ser83Phe Asp87Asn  | -         | -                    | -         | -            | ND     | 0.25-4     | [74, 96]                                  |
|          | R                | Ser83Phe Asp87Asn  | -         | Ser80Ile             | -         | -            | No/ND  | 0.5- 63    | [72, 74, 76, 78, 80, 87]                  |
|          | R                | Ser83Phe           | -         | Ser80Ile             | -         | -            | No     | 2          | [87]                                      |
|          | S                | Glu133Gly          | -         | -                    | -         | -            | ND     | 0.06       | [89, 90, 95]                              |
|          | S                | Glu133Gly          | Ser426Gly | -                    | -         | -            | ND     | NG         | [95]                                      |
|          | R                | Ser83Phe Asp87Asn  | -         | Thr57Ser<br>Glu84Lys | -         | -            | ND     | NG         | [95]                                      |
|          | S                | Ser83Phe Glu133Gly | -         | Asp79Gly             | -         | -            | ND     | NG         | [95]                                      |
|          | S                | Ser83Phe Glu133Gly | -         | -                    | Glu543Lys | -            | ND     | NG         | [95]                                      |

|                |       |                                |           |                      |           |              |     |           |          |
|----------------|-------|--------------------------------|-----------|----------------------|-----------|--------------|-----|-----------|----------|
|                | S     | Ser83Phe Glu133Gly             | -         | -                    | Val560Gly | -            | ND  | NG        | [95]     |
|                | I     | Ser83Phe Glu133Gly             | -         | -                    | Ile444Ser | -            | ND  | NG        | [95]     |
|                | S     | Ser83Phe Glu133Gly             | -         | -                    | Tyr434Ser | -            | ND  | NG        | [95]     |
|                | R     | Ser83Phe Asp87Gly              | -         | Glu92Lys             | -         | -            | Yes | 8-16      | [85]     |
|                | I     | Ser83Phe Glu133Gly             | -         | -                    | -         | -            | ND  | 0.25-0.38 | [32, 90] |
|                | R     | Ser83Tyr Glu133Gly             | -         | -                    | -         | <i>qnrS1</i> | ND  | 2         | [34]     |
|                | I     | Ser83Phe Glu133Gly             | Ala574Val | -                    | -         | -            | ND  | 0.38      | [34]     |
|                | I     | Glu133GlySer83Phe              | -         | -                    | -         | -            | ND  | 0.5       | [99]     |
|                | I     | †Gly133Glu<br>Ser83Phe         | -         | -                    | -         | -            | ND  | ≤1        | [91]     |
|                | I – R | Ser83Phe                       | -         | Trp106Gly            | -         | ND           | ND  | 0.125-1   | [96]     |
|                | R     | Ser83Phe Asp87Asn<br>Glu133Gly | -         | Ser80Ile             | -         | ND           | ND  | 7mm       | [34]     |
|                | R     | Ser83Phe Asp87Asn              | Gly435Glu | Ser80Ile             | -         | -            | ND  | 12        | [76]     |
|                | I     | Ser83Phe                       | Gly435Ala | -                    | -         | -            | ND  | 0.15      | [76]     |
|                | I     | Asp87Asn                       | Gly435Glu | -                    | -         | -            | ND  | 0.19      | [76]     |
|                | I     | Ser83Phe                       | Gly435Glu | -                    | -         | -            | ND  | 0.25      | [76]     |
|                | I     | Ser83Phe                       | Gly435Val | -                    | -         | -            | ND  | 0.5       | [76]     |
|                | I     | -                              | Ser464Tyr | -                    | -         | -            | ND  | 0.125     | [72, 93] |
|                | I     | -                              | Ser464Phe | -                    | -         | -            | ND  | 0.125     | [72, 93] |
|                | S     | -                              | Ser464Thr | -                    | -         | -            | ND  | 0.06      | [93]     |
|                | I     | Glu133Gly                      | Ser464Phe | -                    | -         | -            | ND  | 0.25      | [99]     |
|                | S     | -                              | Gln465Leu | -                    | -         | -            | ND  | 0.04-0.08 | [72]     |
|                | S     | -                              | Glu466Asp | -                    | -         | -            | ND  | 0.04      | [72]     |
|                | S     | -                              | Ala468Glu | -                    | -         | -            | ND  | 0.03      | [72]     |
| S. Paratyphi A | I     | Ser83Tyr                       | -         | -                    | -         | -            | ND  | 21mm      | [34, 71] |
|                | R     | Ser83Phe Asp87Gly              | ND        | ND                   | -         | -            | ND  | 32        | [100]    |
|                | R     | Ser83Phe Asp87Asn              | -         | Thr57Ser<br>Glu84Lys | -         | -            | ND  | NG        | [95]     |
|                |       | Ser83Phe                       |           |                      | Ile444Ser |              |     |           | [95]     |
|                | I – R | Ser83Phe                       | -         |                      | -         | -            | ND  | 0.125-1   | [71, 95] |
|                | I     | Ser83Phe                       | -         | Thr57Ser             | -         | -            | ND  | 0.5       | [99]     |
|                | I     | Ser83Phe                       | -         | Thr57Ser             | -         | -            | ND  | 21-26 mm  | [34, 95] |
|                | R – I | Asp87Asn                       | -         | -                    | -         | -            | ND  | 0.125-1   | [71]     |
|                | I     | Asp87Tyr                       | -         | Thr57Ser             | -         | ND           | ND  | 22 mm     | [34]     |
| rat<br>yp      | I     | Ser83Phe                       | -         | -                    | -         | -            | ND  | 0.25-0.5  | [34]     |
|                |       | Ser83Phe                       | -         | -                    | Ser498Thr |              | ND  |           | [95]     |

|                |   |                    |    |    |    |    |    |                    |           |
|----------------|---|--------------------|----|----|----|----|----|--------------------|-----------|
| S. Paratyphi C | I | Ser83Tyr           | -  | -  | -  | -  | ND | 28mm / $\leq 1$    | [34] [91] |
|                | I | Asp87Tyr           | -  | -  | -  | -  | ND | 21-28mm            | [34]      |
|                | I | Asp87Asn           | ND | ND | ND | ND | ND | $\leq 1$           | [91]      |
|                | I | Asp87Gly           | -  | -  | -  | -  | ND | 22-26mm / $\leq 1$ | [34] [91] |
|                | I | Arg47Ser Asp87Gly  | ND | ND | ND | ND | ND | $\leq 1$           | [91]      |
|                | I | Asp87Tyr           | ND | ND | ND | ND | ND | $\leq 1$           | [91]      |
|                | I | Asp87Gly           | ND | ND | ND | ND | ND | $\leq 1$           | [91]      |
|                | I | Asp87Asn           | ND | ND | ND | ND | ND | $\leq 1$           | [91]      |
|                | I | Ser83Phe Asp147Gly | ND | ND | ND | ND | ND | $\leq 1$           | [91]      |

**Table S1: Mutations in the QRDRs of typhoidal *Salmonella*, namely *Salmonella* Typhi, *Salmonella* Paratyphi A, B and C.** Clinical and Laboratory

Standards Institute (CLSI) guidelines [58] were followed to ensure a uniform classification of isolates showing ciprofloxacin resistance. According to these guidelines, resistant isolates have an MIC of 1–2 mg/L, isolates with intermediate susceptibility have an MIC of 0.12–0.5 mg/L, and susceptible isolates have an MIC of  $\leq 0.06$  mg/L. †Walther-Rausmussen and Hoiby [88] reported that *S. Typhi* has Gly instead of Glu at position 133 and the double mutant was Gly133Glu and Ser83Phe. CIP<sup>r</sup>: ciprofloxacin resistance phenotype; ND: not determined; NG: not given; S: susceptible; I: intermediate susceptibility; R: resistant.

| <b>Table S2: <i>Salmonella</i> Enteritidis</b> |                    |                    |                               |                    |                      |               |                   |                                                           |
|------------------------------------------------|--------------------|--------------------|-------------------------------|--------------------|----------------------|---------------|-------------------|-----------------------------------------------------------|
| <b>CIP<sup>r</sup></b>                         | <b><i>gyrA</i></b> | <b><i>gyrB</i></b> | <b><i>parC</i></b>            | <b><i>ParE</i></b> | <b>PMQR</b>          | <b>Efflux</b> | <b>MIC (mg/L)</b> | <b>References</b>                                         |
| I-R                                            | Asp87Tyr           | -                  | -                             | -                  | -                    | ND            | 0.09-1            | [28, 34, 89, 106, 107, 108, 109, 110, 111, 113, 114, 115] |
| I-R                                            | Asp87Gly           | -                  | -                             | -                  | -                    | ND            | 0.125-1           | [34, 89, 107, 108, 111, 112, 114, 115, 116]               |
| I                                              | Asp87Tyr           | -                  | -                             | -                  | <i>qnrB</i>          | ND            | 0.086             | [113]                                                     |
| R                                              | Asp87Tyr           | -                  | -                             | -                  | <i>qnrS2</i>         | ND            | 2                 | [28]                                                      |
| R                                              | Asp87Tyr           | -                  | -                             | -                  | <i>qnrS1</i>         | ND            | 1                 | [108]                                                     |
| I                                              | Asp87Asn           | -                  | -                             | -                  | -                    | ND            | 0.032-0.25        | [89, 91, 107, 110, 113, 115, 116, 117]                    |
| R                                              | Asp87Asn           | -                  | -                             | -                  | <i>qnrS1</i>         | ND            | 1                 | [108, 112]                                                |
| R                                              | Asp87Asn           | -                  | -                             | -                  | <i>aac(6')-lb-cr</i> | ND            | 2                 | [32]                                                      |
| I                                              | Ser83Ile           | -                  | -                             | -                  | -                    | ND            | 0.09-0.38         | [108, 115]                                                |
| I-R                                            | Ser83Phe           | -                  | -                             | -                  | -                    | ND            | 0.125-1           | [28, 34, 106, 107, 108, 112, 113, 115, 116]               |
| I                                              | Ser83Phe           | -                  | -                             | -                  | <i>qnrB</i>          | ND            | 0.25              | [32]                                                      |
| I                                              | -                  | -                  | -                             | Val521Phe          | <i>qnrS1</i>         | ND            | 0.09              | [108]                                                     |
| I                                              | Ser83Phe           | -                  | Thr57Ser                      | -                  | -                    | ND            | 0.25              | [32]                                                      |
| I                                              | Ser83Tyr           | -                  | -                             | -                  | -                    | ND            | 0.25-0.5          | [28, 34, 107, 108, 112, 115]                              |
| R                                              | Ser83Tyr           | -                  | -                             | -                  | <i>qnrS1</i>         | ND            | 1-3               | [34, 108, 115]                                            |
| I                                              | Ser83Tyr Asp87Gly  | -                  | -                             | -                  | -                    | ND            | 0.125             | [112]                                                     |
| I                                              | Ser83Tyr Asp87Asn  | -                  | -                             | -                  | -                    | ND            | 0.125-0.25        | [34, 112]                                                 |
| S-I                                            | Ser83Phe Asp87Asn  | -                  | -                             | -                  | -                    | ND            | 0.064-0.125       | [34, 112]                                                 |
| I                                              | Ser83Phe Asp87Gly  | -                  | -                             | -                  | -                    | ND            | 0.125             | [112]                                                     |
| I                                              | Ser83Phe Asp87Tyr  | -                  | -                             | -                  | -                    | ND            | 4                 | [112, 115, 119]                                           |
| R                                              | Ser83Phe Asp87Ser  | -                  | Ser67Cys Arg76Cys<br>Cys80Arg | ND                 | -                    | Yes           | 256               | [39]                                                      |
| I                                              | Asp87Tyr Ala131Gly | -                  | -                             | -                  | -                    | ND            | 0.125             | [112]                                                     |
| S                                              | Ser97Pro           | -                  | -                             | -                  | -                    | ND            | 0.06              | [113]                                                     |

**Table S2: Mutations in the QRDRs of *Salmonella* Enteritidis.** CLSI guidelines [58] were followed to ensure a uniform classification of isolates showing ciprofloxacin resistance. According to these guidelines, resistant isolates have an MIC of 1–2 mg/L, isolates with intermediate susceptibility have an MIC of 0.12–0.5 mg/L, and susceptible isolates have an MIC of  $\leq 0.06$  mg/L. Asp87Tyr substitution is predominant among *S. Enteritidis* isolates worldwide. PMQR determinants are rare, but present in isolates from Asia, Europe and America. The contribution of efflux to resistance has not been studied extensively. CIP<sup>r</sup>: ciprofloxacin resistance phenotype; ND: not determined; S: susceptible; I: intermediate susceptibility; R: resistant.

| <b>Table S3: <i>Salmonella</i> Typhimurium</b> |                                |                    |                    |                    |                                    |               |                   |                     |
|------------------------------------------------|--------------------------------|--------------------|--------------------|--------------------|------------------------------------|---------------|-------------------|---------------------|
| <b>CIP<sup>r</sup></b>                         | <b><i>gyrA</i></b>             | <b><i>gyrB</i></b> | <b><i>parC</i></b> | <b><i>parE</i></b> | <b>PMQR</b>                        | <b>Efflux</b> | <b>MIC (mg/L)</b> | <b>References</b>   |
| S-I                                            | -                              | Glu466Asp          | -                  | -                  | -                                  | ND            | 0.06-0.25         | [89, 126]           |
| I                                              | Asp87Asn                       | -                  | -                  | -                  | -                                  | ND            | 0.125-0.25        | [28, 34, 107, 112]  |
| I                                              | -                              | -                  | Thr57Ser           | ND                 | -                                  | ND            | 0.19              | [34]                |
| R                                              | Asp87Asn                       | -                  | -                  | -                  | <i>aac(6')-Ib-cr</i>               | ND            | 2-4               | [124]               |
| R                                              | Asp87Asn                       | -                  | -                  | -                  | <i>aac(6')-Ib-cr, oqxA/B</i>       | Yes           | 2-4               | [153]               |
| R                                              | Asp87Asn                       | -                  | -                  | -                  | <i>aac(6')-Ib-cr, oqxA/B-qnrS1</i> | Yes           | 2- >32            | [153]               |
| R                                              | Asp87Asn                       | -                  | -                  | -                  | <i>aac(6')-Ib-cr, qnrB</i>         | Yes           | 2                 | [153]               |
| I                                              | Asp87Asn                       | -                  | Thr57Ser           | -                  | <i>oqxA/B</i>                      | -             | 0.38              | [32]                |
| R                                              | Asp87Asn                       | -                  | -                  | -                  | <i>oqxA/B</i>                      | Yes           | 4                 | [125, 153]          |
| R                                              | Asp87Gly                       | -                  | -                  | -                  | -                                  | ND            | 1.12*             | [108]               |
| R                                              | Asp87Gly                       | ND                 | -                  | ND                 | <i>aac(6')-Ib-cr</i>               | ND            | 1                 | [134]               |
| R                                              | Asp87Tyr                       | -                  | -                  | -                  | <i>oqxAB</i>                       | ND            | 4                 | [125]               |
|                                                | Asp87Tyr                       | ND                 | -                  | ND                 | <i>qnrS1</i>                       | ND            | 0.25              | [117]               |
| I-R                                            | Asp87Tyr                       | -                  | -                  | ND                 | -                                  | ND            | 0.125-4           | [34, 107, 117, 124] |
| R                                              | Asp87Tyr                       | -                  | -                  | -                  | <i>aac(6')-Ib-cr</i>               | ND            | 2-4               | [124]               |
| R                                              | Asp87Tyr                       | -                  | -                  | -                  | <i>aac(6')-Ib-cr, qnrB</i>         | ND            | 4                 | [124]               |
| I                                              | Ser83Tyr                       | -                  | Ser80Arg           | -                  | -                                  | ND            | 0.75              | [32]                |
| I                                              | Ser83Tyr                       | -                  | -                  | -                  | -                                  | No            | 0.12-1            | [34, 89, 107, 112]  |
| R                                              | Ser83Tyr                       | ND                 | -                  | ND                 | <i>aac(6')-Ib-cr, qnrS1</i>        | ND            | 8                 | [131]               |
| I                                              | Ser83Tyr                       | -                  | -                  | -                  | <i>oqxA/B</i>                      | ND            | 0.19              | [32]                |
| I                                              | Ser83Phe                       | -                  | -                  | -                  | ND                                 | ND            | 0.125-0.25        | [107, 117]          |
| R                                              | Ser83Phe                       | -                  | -                  | -                  | <i>qnrS1</i>                       | ND            | 1.12*             | [108]               |
| R                                              | Ser83Phe                       | -                  | -                  | -                  | <i>oqxA/B</i>                      | Yes           | 4                 | [125, 153]          |
| I                                              | -                              | -                  | -                  | Met438Ile          | <i>qnrS1</i>                       | ND            | 0.38              | [108]               |
| I-R                                            | Ser83Phe Asp87Asn              | -                  | The57Ser Ser80Ile  | ND                 | -                                  | ND            | 0.19- >32         | [34]                |
| R                                              | Ser83Phe Asp87Asn              | -                  | The57Ser Ser80Arg  | -                  | <i>aac(6')-Ib-cr</i>               | ND            | 4                 | [124]               |
| I                                              | Ser83Phe Glu133Gly             | -                  | -                  | ND                 | -                                  | ND            | 0.125             | [34]                |
| R                                              | Ser83Phe Asp87Asn              | -                  | Ser80Arg           | ND                 | -                                  | ND            | 4-12              | [34, 124, 125]      |
| R                                              | Ser83Phe Asp87Asn              | -                  | Ser80Arg           | -                  | <i>aac(6')-Ib-cr</i>               | ND            | 4- >8             | [124, 125]          |
| R                                              | Ser83Phe Asp87Asn              |                    | Ser80Arg           | -                  | <i>qepA</i>                        | ND            | >8                | [125]               |
| R                                              | Ser83Phe Asp87Asn              |                    | Ser80Arg           |                    | <i>aac(6')-Ib-cr, oqxAB</i>        |               | >8                | [125]               |
| R                                              | Ser83Phe Asp87Gly              | -                  | Ser80Arg           | -                  | -                                  | ND            | 4                 | [124]               |
| R                                              | Ser83Phe Asp87Gly<br>Ala119Ser | ND                 | -                  | ND                 | -                                  | Yes           | 512               | [39]                |

**Table S3: Mutations in the QRDRs of *Salmonella* Typhimurium.** CLSI guidelines [58] were followed to ensure a uniform classification of isolates

showing ciprofloxacin resistance. According to these guidelines, resistant isolates have an MIC of 1–2 mg/L, isolates with intermediate susceptibility have

an MIC of 0.12–0.5 mg/L, and susceptible isolates have an MIC of  $\leq 0.06$  mg/L. While, *S. Typhimurium* isolates have been reported that do not have QRDR mutations but carry PMQR elements, only isolates that have QRDR mutations are discussed in this review. \*MIC is given as the geometrical mean value [108]. CIP<sup>r</sup>: ciprofloxacin resistance phenotype; ND: not determined; S: susceptible; I: intermediate susceptibility; R: resistant.

| <b>Table S4: <i>Salmonella</i> Hadar</b> |                    |                      |                    |              |               |                   |                   |
|------------------------------------------|--------------------|----------------------|--------------------|--------------|---------------|-------------------|-------------------|
| <b>CIP<sup>r</sup></b>                   | <b><i>gyrA</i></b> | <b><i>parC</i></b>   | <b><i>parE</i></b> | <b>PMQR</b>  | <b>Efflux</b> | <b>MIC (mg/L)</b> | <b>References</b> |
| S-I                                      | Asp87Tyr           | -                    | -                  | -            | ND            | 0.047-0.125       | [108, 133]        |
| I                                        | Asp87Tyr           | Thr57Ser             | -                  | -            | ND            | 0.25              | [28, 134]         |
| I                                        | Asp87Asn           | -                    | -                  | -            | ND            | 0.094-0.125       | [34, 133]         |
| I                                        | Asp87Asn           | -                    | ND                 | -            | Yes           | 0.75              | [106]             |
| I                                        | Asp87Asn           | Thr57Ser             | -                  | -            | ND            | 0.125-0.25        | [28, 107]         |
| I                                        | Asp87Asn           | Thr57Ser<br>Ser80Ile | ND                 | -            | ND            | 0.19              | [34]              |
| I                                        | Asp87Asn           | Thr57Ser             | ND                 | <i>qnrD1</i> | ND            | 29mm (ZOI)        | [34]              |
| I                                        | Ser83Phe           | Thr57Ser             | ND                 | -            | ND            | 0.25              | [34]              |
| R                                        | Ser83Phe Asp87Asn  | Ser80Ile             | -                  | -            | ND            | 8                 | [133]             |
| I                                        | Ser83Phe Asp87Asn  | Thr57Ser             | ND                 | -            | ND            | 0.38              | [34]              |
| I                                        | Ser83Tyr           | -                    | -                  | <i>qnrD2</i> | ND            | 0.75              | [133]             |
| S                                        | Ser83Tyr           | -                    | -                  | -            | ND            | 0.064-0.125       | [133]             |
| R                                        | Asp87Tyr           | Arg96Ser<br>Pro98Lys |                    | -            | ND            | 1.12*             | [108]             |

**Table S4: Mutations in the QRDR of *Salmonella* Hadar.** CLSI guidelines [58] were followed to ensure a uniform classification of isolates showing ciprofloxacin resistance. According to these guidelines, resistant isolates have an MIC of 1–2 mg/L, isolates with an intermediate susceptibility have an MIC of 0.12–0.5 mg/L, and susceptible isolates have an MIC of  $\leq 0.06$  mg/L. None of the listed isolates carried a mutation in the *gyrB* gene. Similarly, no mutations were reported for the *parE* gene, but this was not studied in all isolates (as indicated by ND). \*MIC is given as the geometrical mean value [108]. CIP<sup>r</sup>: ciprofloxacin resistance phenotype; ZOI: zone of inhibition; ND: not determined; S: susceptible; I: intermediate susceptibility; R: resistant.

| <b>Table S5: <i>Salmonella</i> Kentucky</b> |                    |                    |                    |                      |               |                   |                   |
|---------------------------------------------|--------------------|--------------------|--------------------|----------------------|---------------|-------------------|-------------------|
| <b>CIP<sup>r</sup></b>                      | <b><i>gyrA</i></b> | <b><i>parC</i></b> | <b><i>parE</i></b> | <b>PMQR</b>          | <b>Efflux</b> | <b>MIC (mg/L)</b> | <b>References</b> |
| I                                           | Ser83Tyr           | -                  | -                  | -                    | ND            | 0.125             | [133]             |
| ‡I                                          | Ser83Phe           | -                  |                    |                      | No            | 0.125-0.5         | [41]              |
| I-R                                         | Ser83Phe           | Ser80Ile           | -                  | -                    | ND            | 0.19-8            | [133]             |
| R                                           | Ser83Phe           | Ser80Ile           | -                  | -                    | ND            | 6 - >32           | [133]             |
| I                                           | Asp87Asn           | Thr57Ser           | ND                 | -                    | ND            | 0.19              | [34]              |
|                                             | Asp87Gly           | -                  | ND                 | -                    | ND            | 0.047             | [117]             |
| R                                           | Ser83Phe           | Thr57Ser Ser80Ile  | ND                 | -                    | ND            | 8-32              | [34]              |
| R                                           | Ser83Phe Asp87Gly  | Ser80Ile           | -                  | -                    | No            | 6-8               | [133]             |
| ‡R                                          | Ser83Phe Asp87Tyr  | Ser80Ile           | -                  | -                    | Yes           | 4-8               | [41, 133]         |
| ‡R                                          | Ser83Phe Asp87Gly  | Ser80Ile           | -                  | -                    | Yes           | 3-8               | [41, 133]         |
| R                                           | Ser83Phe Asp87Gly  | Thr57Ser Ser80Ile  | -                  | -                    | ND            | 9 -14 mm (ZOI)    | [30, 34]          |
| R                                           | Ser83Phe Asp87Tyr  | Thr57Ser Ser80Ile  | -                  | -                    | ND            | 6 - ≥ 8           | [34, 148]         |
| R                                           | Ser83Phe Asp87Asn  | Thr57Ser Ser80Ile  | ND                 | -                    | ND            | 8 - >32           | [34]              |
| ‡R                                          | Ser83Phe Asp87Asn  | Ser80Ile           | -                  | <i>aac(6')-Ib-cr</i> | ND            | ≥ 4               | [144]             |
| ‡R                                          | Ser83Phe Asp87Asn  | Ser80Ile           |                    |                      | Yes           | 8-16              | [41]              |
| R                                           | Ser83Phe Asp87Tyr  | Thr57Ser Ser80Ile  | ND                 | <i>qnrB1</i>         | ND            | 32                | [34]              |
| R                                           | Ser83Phe Asp87Asn  | Thr57Ser Ser80Ile  | ND                 | <i>qnrD</i>          | ND            | 24                | [34]              |
| S                                           | -                  | Thr57Ser           | ND                 | <i>qnrD</i>          | ND            | 0.064             | [34]              |
| R                                           | -                  | Thr57Ser           | -                  | <i>qnrS1</i>         | ND            | 8                 | [145]             |
| I                                           | -                  | Thr57Ser           | ND                 | <i>qnrB1/qnrD</i>    | ND            | 0.25              | [34]              |

**Table S5: Mutations in the QRDRs of *Salmonella* Kentucky.** CLSI guidelines [58] were followed to ensure a uniform classification of isolates showing ciprofloxacin resistance. According to these guidelines, resistant isolates have an MIC of 1–2 mg/L, isolates with intermediate susceptibility have an MIC of 0.12–0.5 mg/L, and susceptible isolates have an MIC of ≤ 0.06 mg/L. None of the listed isolates was found to have a mutation in the *gyrB* gene. Similarly, no mutations were reported for the *parE* gene, but this was not studied in all isolates (as indicated by ND). CIP<sup>r</sup>: ciprofloxacin resistance phenotype; ZOI: zone of inhibition; ND: not determined; S: susceptible; I: intermediate susceptibility; [R]: resistant. ‡*Salmonella* Kentucky isolates were confirmed to be ST198 [41, 144].



| <b>Table S6: <i>Salmonella</i> Indiana</b> |                   |             |                   |                                   |                   |                   |
|--------------------------------------------|-------------------|-------------|-------------------|-----------------------------------|-------------------|-------------------|
| <b>CIP<sup>r</sup></b>                     | <b>GyrA</b>       | <b>GyrB</b> | <b>ParC</b>       | <b>PMQR</b>                       | <b>MIC (mg/L)</b> | <b>References</b> |
| S-R                                        | -                 | -           | Thr57Ser          | -                                 | 0.06-1            | [107]             |
| R                                          | Ser83Leu          | -           | Ser80Ile          | <i>aac(6')-Ib-cr</i>              | 4                 | [150]             |
| R                                          | Ser83Leu Asp87Asn | -           | Thr57Ser Ser80Arg | <i>aac(6')-Ib-cr, oqxA</i>        | 32                | [149]             |
| R                                          | Ser83Ile Asp87Asn | -           | -                 | <i>aac(6')-Ib-cr</i>              | 2                 | [150]             |
| I                                          | Ser83Tyr          | -           | -                 | <i>qnrA</i>                       | 0.25              | [149]             |
| R                                          | Ser83Tyr          | -           | Ser80Ile          | <i>aac(6')-Ib-cr</i>              | 2                 | [150]             |
| R                                          | Ser83Phe Asp87Gly | -           | Thr57Ser          | <i>oqxA</i>                       | 128               | [149]             |
| R                                          | Ser83Phe Asp87Gly | -           | Thr57Ser Ser80Arg | <i>oqxAB</i>                      | 8-64              | [151]             |
| R                                          | Ser83Phe Asp87Asn | -           | Thr57Ser Ser80Arg | <i>oqxAB</i>                      | 32                | [151]             |
| R                                          | Ser83Phe          | -           | Thr57Ser Ser80Arg | <i>oqxAB/ qepA</i>                | 32                | [151]             |
| R                                          | Ser83Phe Asp87Asn | -           | -                 | <i>aac(6')-Ib-cr/ oqxAB</i>       | *>32              | [153]             |
| R                                          | Ser83Phe Asp87Asn | -           | Ser80Arg          | <i>aac(6')-Ib-cr, oqxAB, qnrB</i> | *>32              | [153]             |
| R                                          | Ser83Phe Asp87Asn | -           | Thr57Ser Ser80Arg | <i>aac(6')-Ib-cr</i>              | 32-64             | [151, 152]        |
| R                                          | Ser83Phe Asp87Asn | -           | Thr57Ser Ser80Arg | -                                 | 8-16              | [151]             |
| R                                          | Ser83Phe Asp87Asn | -           | Thr57Ser Ser80Arg | <i>aac(6')-Ib-cr, oqxAB</i>       | 64-128            | [151, 152]        |
| R                                          | Ser83Phe Asp87Asn | -           | Thr57Ser Ser80Arg | <i>aac(6')-Ib-cr, oqxA, qnrA</i>  | 64                | [149]             |
| R                                          | Ser83Phe Asp87Gly | -           | Thr57Ser Ser80Arg | <i>aac(6')-Ib-cr oqxA, qnrA</i>   | 64                | [149]             |
| R                                          | Ser83Phe Asp87Gly | -           | Thr57Ser Ser80Arg | <i>aac(6')-Ib-cr, oqxAB</i>       | 64-128            | [151, 152]        |
| R                                          | Ser83Phe Asp87Gly | -           | Thr57Ser Ser80Arg | <i>aac(6')-Ib-cr</i>              | 16                | [149]             |
| R                                          | Ser83Phe Asp87Gly | -           | Thr57Ser Ser80Arg | -                                 | 8-128             | [151, 152]        |
| R                                          | Ser83Phe Asp87Asn | -           | Cys72Gly Ser80Arg | <i>aac(6')-Ib-cr, oqxAB</i>       | *>32              | [153]             |

**Table S6: Mutations in the QRDRs of *Salmonella* Indiana.** CLSI guidelines [58] were followed to ensure a uniform classification of isolates showing ciprofloxacin resistance. According to these guidelines, resistant isolates have an MIC of 1–2 mg/L, isolates with intermediate susceptibility have an MIC of 0.12–0.5 mg/L, and susceptible isolates have an MIC of  $\leq 0.06$  mg/L. None of the listed isolates was found to have a mutation in the *gyrB* and *parE* genes. \*Efflux inhibition resulted in a reduction of the MIC to >8 mg/L [153]; efflux was not studied for the other isolates. CIP<sup>r</sup>: ciprofloxacin resistance phenotype; S: susceptible; I: intermediate susceptibility, R: resistant.

| <b>Table S7: <i>Salmonella</i> Infantis</b> |                      |                    |                    |              |                   |                   |
|---------------------------------------------|----------------------|--------------------|--------------------|--------------|-------------------|-------------------|
| <b>CIP<sup>r</sup></b>                      | <b><i>gyrA</i></b>   | <b><i>gyrB</i></b> | <b><i>parC</i></b> | <b>PMQR</b>  | <b>MIC (mg/L)</b> | <b>References</b> |
| I-R                                         | Ser83Tyr             | -                  | Thr57Ser           | -            | 0.25-1            | [28, 32, 34, 114] |
| I                                           | -                    | -                  | Thr57Ser           | <i>qnrA1</i> | 0.75              | [34]              |
| I                                           | Ser83Tyr             | Leu470Met          | Thr57Ser           | -            | 0.5               | [28]              |
| R                                           | Ser83Tyr             | -                  | Ser80Arg           | -            | 2                 | [155]             |
| R                                           | Ser83Tyr             | -                  | -                  | -            | 1-2               | [155]             |
| S                                           | Ser83Phe             | -                  | -                  | -            | 0.064             | [112]             |
| I                                           | Ser83Leu             | -                  | -                  | -            | < 1               | [91]              |
| I                                           | Asp87Tyr             | -                  | -                  | -            | < 1               | [91, 156]         |
| I-R                                         | Asp87Asn             | -                  | -                  | -            | 0.25-1            | [114, 156]        |
| I                                           | Asp87Gly             | -                  | Thr57Ser           | -            | 0.25              | [34]              |
| I                                           | Leu41Pro<br>Asp87Tyr | -                  | -                  | -            | < 1               | [91]              |

**Table S7: Mutations in the QRDRs of *Salmonella* Infantis.** CLSI guidelines [58] were followed to ensure a uniform classification of isolates showing ciprofloxacin resistance. According to these guidelines, resistant isolates have an MIC of 1–2 mg/L, isolates with intermediate susceptibility have an MIC of 0.12–0.5 mg/L, and susceptible isolates have an MIC of  $\leq 0.06$  mg/L. The isolates reported by Hamidian et al. [91] showed MIC to CIP  $\leq 1$  mg/L, and, according to the updated CLSI guidelines, were thus classified as having intermediate susceptibility. None of the listed isolates was found to have a mutation in the *parE* gene. Efflux was not studied for any of the listed isolates. CIP<sup>r</sup>: ciprofloxacin resistance phenotype; S: susceptible; I: intermediate susceptibility; R: resistant.

| <b>Table S8: <i>Salmonella</i> Derby</b> |                    |                    |                    |                                    |               |                   |                   |
|------------------------------------------|--------------------|--------------------|--------------------|------------------------------------|---------------|-------------------|-------------------|
| <b>CIP<sup>r</sup></b>                   | <b><i>gyrA</i></b> | <b><i>gyrB</i></b> | <b><i>parC</i></b> | <b>PMQR</b>                        | <b>Efflux</b> | <b>MIC (mg/L)</b> | <b>References</b> |
| R                                        | Asp87Gly           | ND                 | -                  | <i>aac(6')-Ib-cr</i>               | ND            | 1                 | [134]             |
| I                                        | Asp87Tyr           | -                  | Thr57Ser           | -                                  | ND            | 0.12              | [34]              |
| I                                        | Asp87Asn           | -                  | Thr57Ser           | -                                  | ND            | 28mm (ZOI)        | [34]              |
| I                                        | Ser83Phe           | -                  | Thr57Ser           | -                                  | ND            | 0.19              | [34]              |
| R                                        | Ser83Ile           |                    | ND                 | <i>oqxAB</i>                       | Yes           | 4                 | [153]             |
| R                                        | Ser83Tyr           | -                  | -                  | <i>aac(6')-Ib-cr, oxqAB, qnrS2</i> | No            | 4                 | [153]             |
| R                                        | Ser83Tyr           | -                  | ND                 | <i>oxqAB, qnrS8, qnrB</i>          | Yes           | 2                 | [153]             |
| R                                        | Ser83Tyr           | -                  | ND                 | <i>oxqAB, qnrS1, qnrB</i>          | Yes           | >32               | [153]             |
| R                                        | Ser83Tyr           | -                  |                    | <i>qnrS1</i>                       | Yes           | 2                 | [153]             |
| R                                        | Asn78His           | -                  | -                  | <i>aac(6')-Ib-cr, oxqAB, qnrS2</i> | No            | 2                 | [153]             |
| I                                        | -                  | -                  | Thr57Ser           | <i>qnrB5</i>                       | ND            | 0.38              | [34]              |

**Table S8: Mutations in the QRDRs of *Salmonella* Derby.** CLSI guidelines [58] were followed to ensure a uniform classification of isolates showing ciprofloxacin resistance. According to these guidelines, resistant isolates have an MIC of 1–2 mg/L, isolates with intermediate susceptibility have an MIC of 0.12–0.5 mg/L, and susceptible isolates have an MIC of  $\leq 0.06$  mg/L. None of the isolates was found to have a mutation in the *parE* gene. CIP<sup>r</sup>: ciprofloxacin resistance phenotype; ZOI: zone of inhibition; ND: not determined; S: susceptible; I: intermediate susceptibility; R: resistant.

| <b>Table S9: <i>Salmonella</i> Newport</b> |                    |                    |                    |                    |                   |                   |
|--------------------------------------------|--------------------|--------------------|--------------------|--------------------|-------------------|-------------------|
| <b>CIP<sup>r</sup></b>                     | <b><i>gyrA</i></b> | <b><i>gyrB</i></b> | <b><i>parC</i></b> | <b>PMQR</b>        | <b>MIC (mg/L)</b> | <b>References</b> |
| I                                          | Asp87Gly           | -                  | Thr57Ser           | -                  | 0.125             | [28, 34]          |
| S-R                                        |                    |                    | Thr57Ser           | -                  | 0.06-1            | [107]             |
| R                                          | Asp87Asn           | -                  | -                  | -                  | 1.12*             | [108, 112]        |
| R                                          | Asp87Asn           | -                  | Arg96Ser Pro98Thr  | <i>qnrS1</i>       | 1.12*             | [108]             |
| I                                          | Ser83Phe           | -                  | Thr57Ser           | -                  | 0.19-0.25         | [28, 34]          |
| I-R                                        | Ser83Tyr           | -                  | Thr57Ser           | -                  | 0.25 -2           | [28]              |
| R                                          | Ser83Tyr           | -                  | Thr57Ser           | <i>qnrS1/qnrS3</i> | 4                 | [28]              |
| I                                          | Asp87Tyr           | ND                 | Thr57Ser           | -                  | 0.125             | [134]             |
| I                                          | -                  | -                  | Thr57Ser           | <i>qnrS1</i>       | 0.25              | [34]              |
| I                                          | Ser83Phe Asp87Asn  | -                  | Thr57Ser           | -                  | 0.25              | [34]              |

**Table S9: Mutations in the QRDRs of *Salmonella* Newport.** CLSI guidelines [58] were followed to ensure a uniform classification of isolates showing ciprofloxacin resistance. According to these guidelines, resistant isolates have an MIC of 1–2 mg/L, isolates with an intermediate susceptibility have an MIC of 0.12–0.5 mg/L, and susceptible isolates have an MIC of  $\leq 0.06$  mg/L. Partially resistant and completely resistant isolates of *S. Newport* show equal prevalence for mutations of residues 83 or 87 and no preference for substitution by a specific residue. However, the Thr57Ser mutation is prevalent in *parC*. None of the isolates was found to have a mutation in the *parE* gene. Efflux was not studied for any of the listed isolates. \*MIC is given as the geometrical mean value [108]. CIP<sup>r</sup>: ciprofloxacin resistance phenotype; ND: not determined; S: susceptible; I: intermediate susceptibility; R: resistant; ND: not determined.

| <b>Table S10: <i>Salmonella</i> Virchow</b> |                      |                    |                    |              |                   |                   |
|---------------------------------------------|----------------------|--------------------|--------------------|--------------|-------------------|-------------------|
| <b>CIP<sup>r</sup></b>                      | <b><i>gyrA</i></b>   | <b><i>gyrB</i></b> | <b><i>parC</i></b> | <b>PMQR</b>  | <b>MIC (mg/L)</b> | <b>References</b> |
| I                                           | Asp87Tyr             | -                  | -                  | -            | 0.094             | [133]             |
| I                                           | Asp87Tyr             | -                  | -                  | <i>qnrB2</i> | 0.25              | [133]             |
| I                                           | Asp87Tyr             | -                  | -                  | <i>qnrS1</i> | 0.5               | [133]             |
| I                                           | Asp87Tyr             | -                  | -                  | -            | 0.094-0.75        | [28, 34, 134]     |
| I                                           | Ser83Phe             | -                  | -                  | -            | 0.25 – 0.5        | [28, 30, 34, 134] |
| R                                           | Ser83Phe             |                    |                    | <i>qnrS1</i> | 2                 | [166]             |
| I                                           | Asp87Tyr             | -                  | -                  | -            | 0.094-0.125       | [133]             |
| I                                           | Ser83Leu<br>Asp87Asn | -                  | -                  | -            | 0.125             | [28]              |
| R                                           | Ser83Phe Asp87Tyr    | -                  | -                  | -            | 4                 | [119]             |

**Table S10: Mutations in the QRDRs of *Salmonella* Virchow.** CLSI guidelines [58] were followed to ensure a uniform classification of isolates showing ciprofloxacin resistance. According to these guidelines, resistant isolates have an MIC of 1–2 mg/L, isolates with intermediate susceptibility have an MIC of 0.12–0.5 mg/L, and susceptible isolates have an MIC of  $\leq 0.06$  mg/L. None of the isolates was found to have a mutation in the *parE* gene. Efflux was not studied for any of the listed isolates. The most prevalent mutation, Ser83Phe, was identified in isolates from Europe [28, 34], Africa [30] and Asia [134, 166]. CIP<sup>r</sup>: ciprofloxacin resistance phenotype; S: susceptible; I: intermediate susceptibility; R: resistant.
