# Supplementary material for: Mutational Diversity in the Quinolone Resistance-Determining Regions of Type-II Topoisomerases of Salmonella Serovars
Source: MDPI journal article supplement (doi:10.3390/antibiotics10121455), 2021-11-26
Supplement: s1 [file s1]

## Supplementary figures

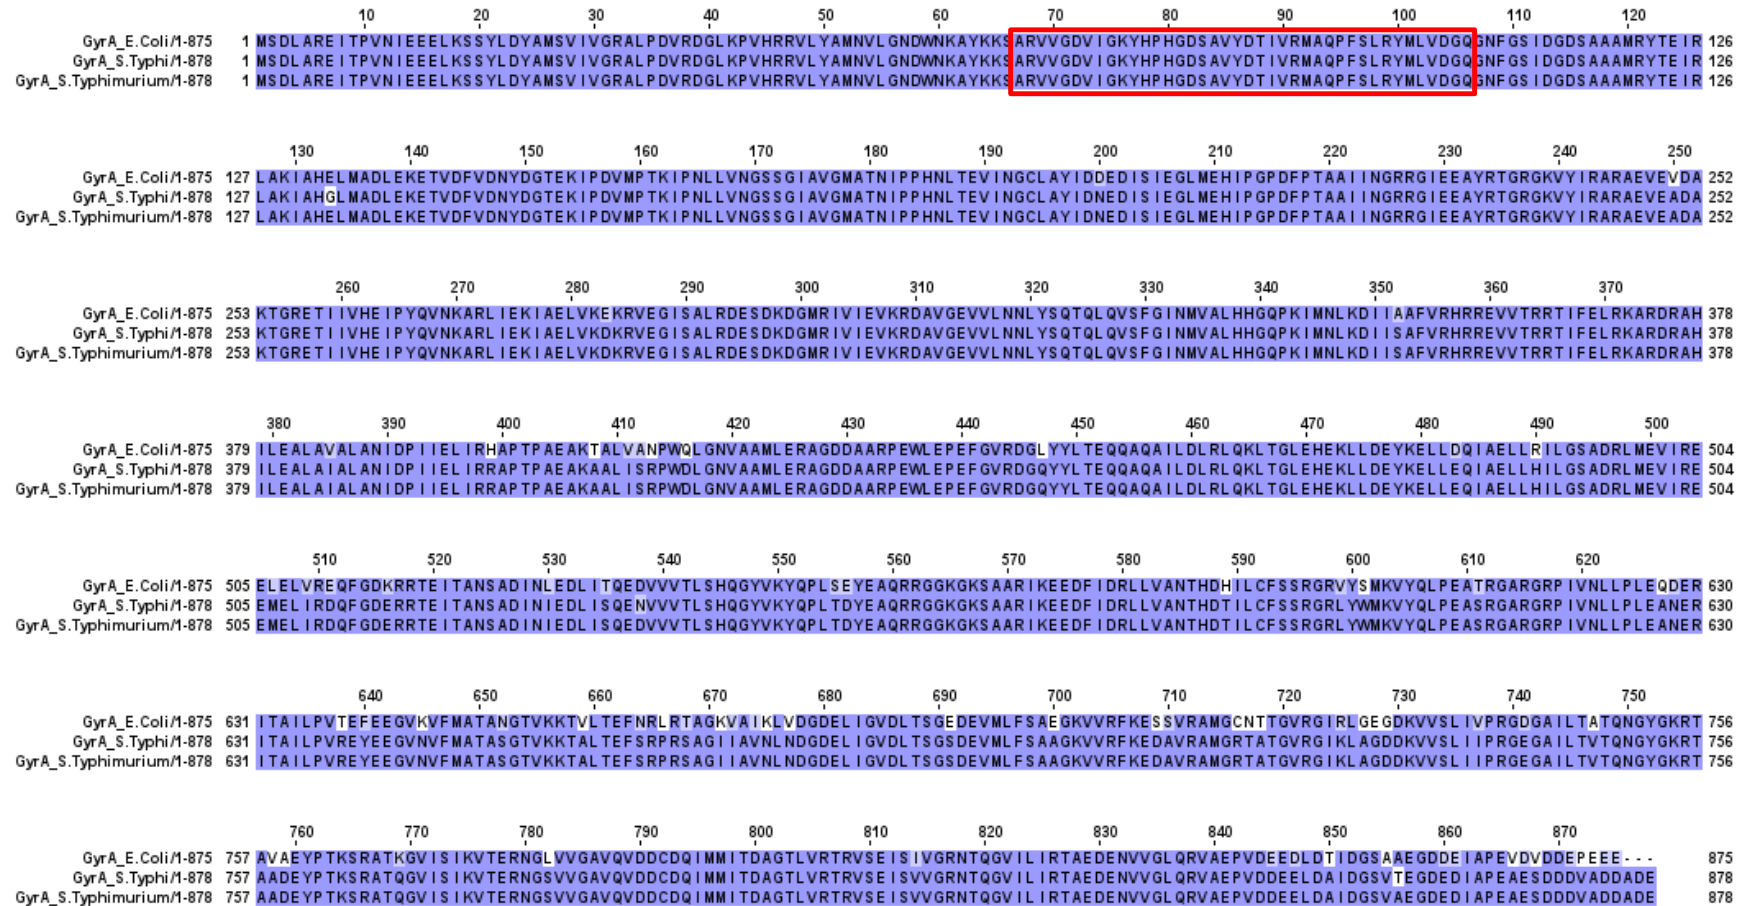

Figure S1: Amino acid sequence alignment of the GyrA homologs from *E. coli* (NCBI accession no. AAG57360.1), *S. Typhi* (NCBI accession no. AAO68297.1) and *S. Typhimurium* (NCBI accession no. AAL21173.1). The red box indicates the QRDR (Ala67-Gln106).

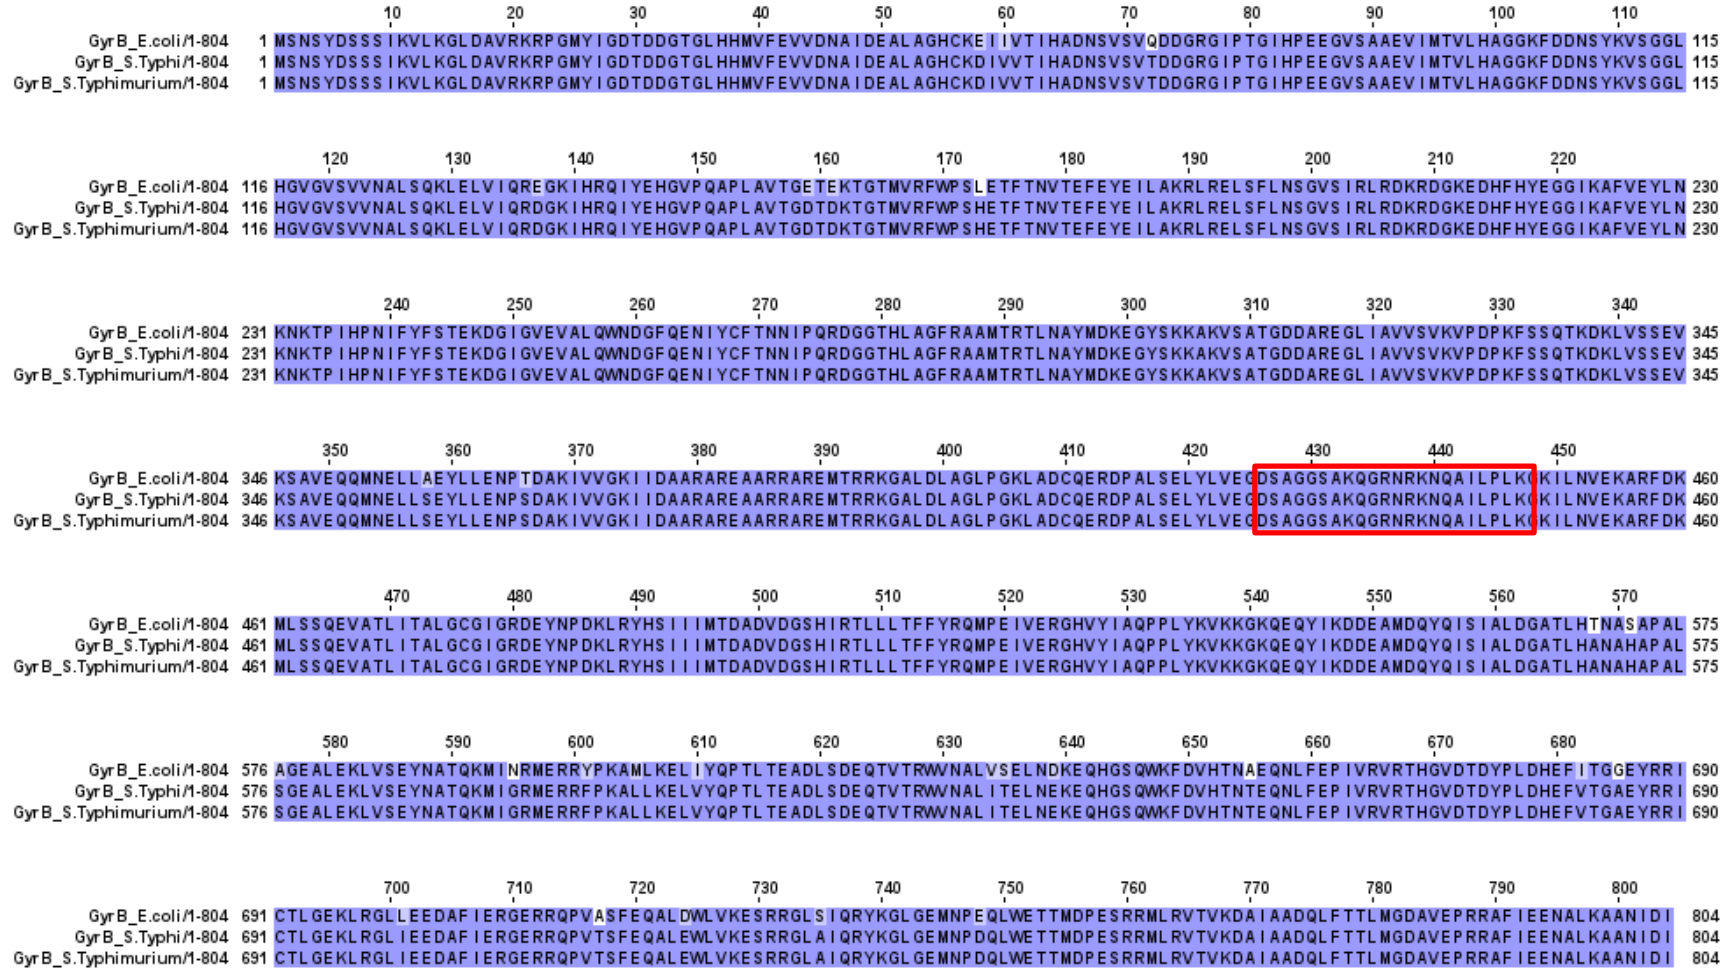

Figure S2: Amino acid sequence alignment of the GyrB homologs from *E. coli* (NCBI accession no. AAG58896.1), *S. Typhi* (NCBI accession no. AAO71180.1) and *S. Typhimurium* (NCBI accession no. AAL22694.1). The red box indicates the QRDR (Asp426-Lys447).

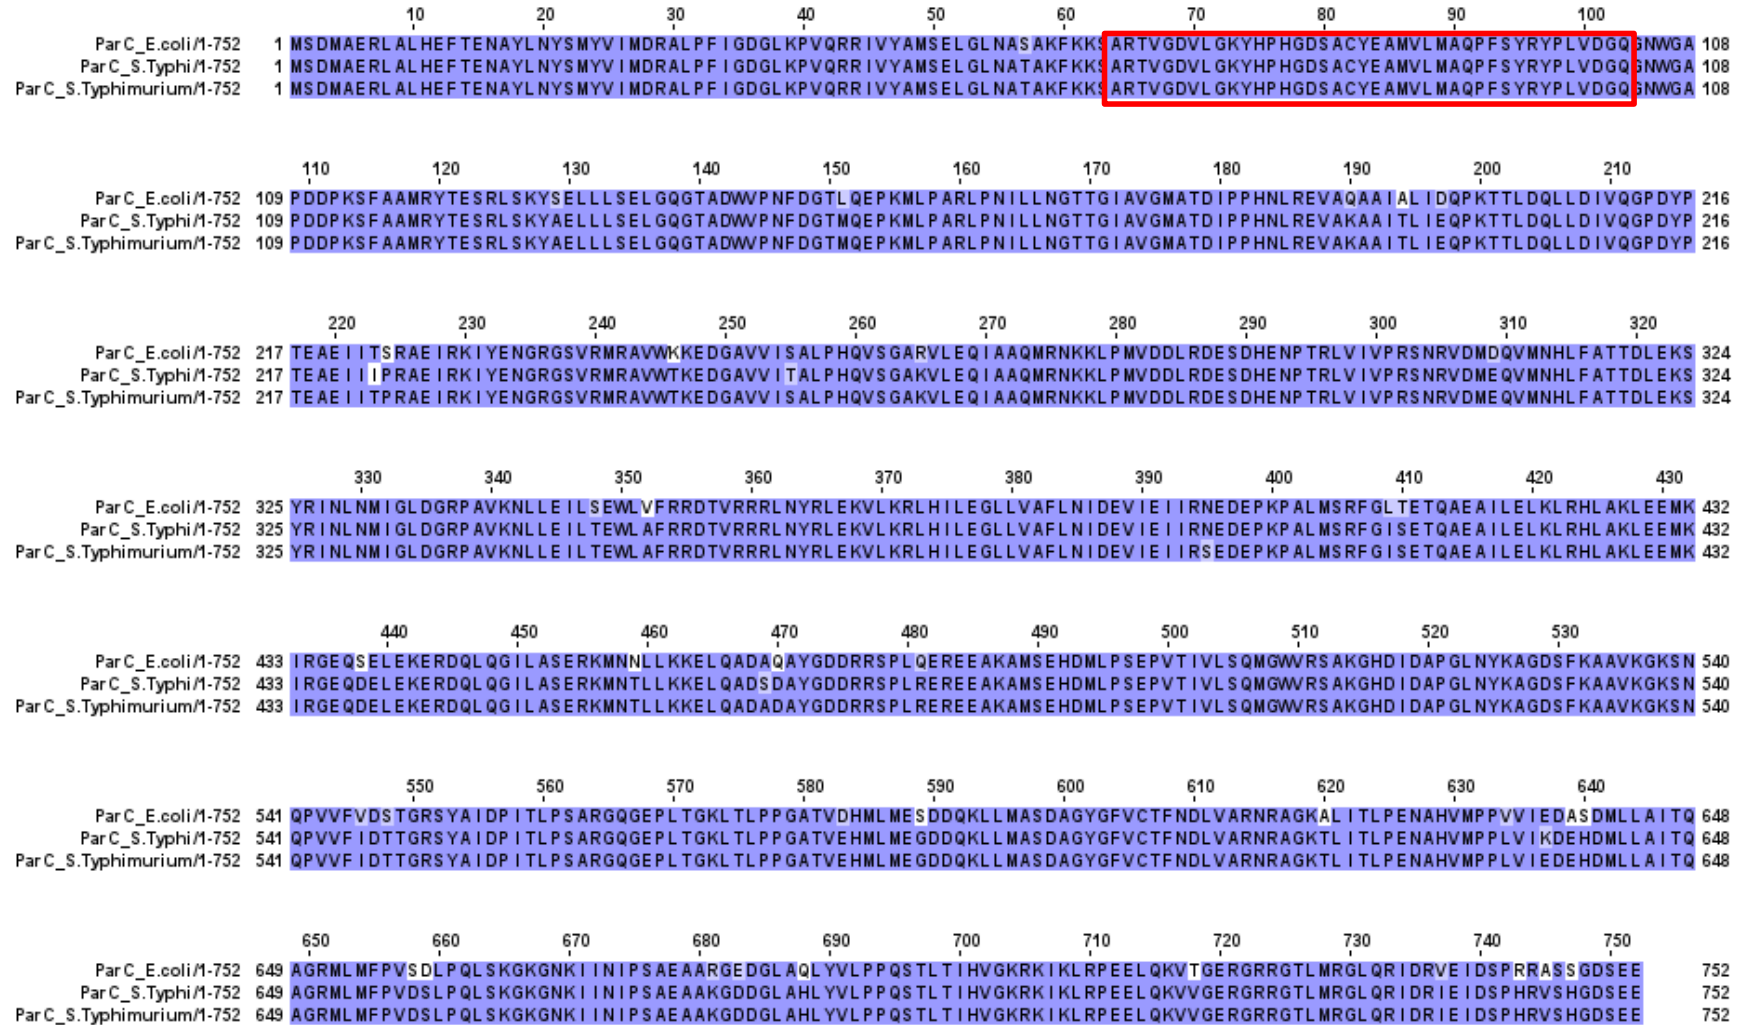

Figure S3: Amino acid sequence alignment of the ParC homologs from *E. coli* (NCBI accession no. AAG58155.1), *S. Typhi* (NCBI accession no. AAO70639.1) and *S. Typhimurium* (NCBI accession no. AAL22048.1). The red box indicates the QRDR (Ala64 to Gln103).

|                          |     |                                                                                               |     |     |     |     |     |     |     |     |
|--------------------------|-----|-----------------------------------------------------------------------------------------------|-----|-----|-----|-----|-----|-----|-----|-----|
|                          |     | 10                                                                                            | 20  | 30  | 40  | 50  | 60  | 70  | 80  |     |
| ParE_E.coli/1-630        | 1   | MTQTYNADAIEVLTGLEPVRRRPGMYTDTTRPNHLGQEVIDNSVDEALAGHAKRVDVILHADQSLEVIDDGRGMPVDIHPEEGVPAVELI    |     |     |     |     |     |     |     | 90  |
| ParE_S.Typhi/1-630       | 1   | MTQTYNADAIEVLTGLEPVRRRPGMYTDTTRPNHLGQEVIDNSVDEALAGHAKRVDVILHADQSLEVIDDGRGMPVDIHPEEGVPAVELI    |     |     |     |     |     |     |     | 90  |
| ParE_S.Typhimurium/1-630 | 1   | MTQTYNADAIEVLTGLEPVRRRPGMYTDTTRPNHLGQEVIDNSVDEALAGHAKRVDVILHADQSLEVIDDGRGMPVDIHPEEGVPAVELI    |     |     |     |     |     |     |     | 90  |
|                          |     | 100                                                                                           | 110 | 120 | 130 | 140 | 150 | 160 | 170 |     |
| ParE_E.coli/1-630        | 91  | LCRLHAGGKFSNKNYQFSGGLHGVGISVVNALS KRVEVXNVRRDGQVYNI AFENG EKVQDLQVVGNCGKRNTGTSVHFWDPTFFDSPRFS |     |     |     |     |     |     |     | 180 |
| ParE_S.Typhi/1-630       | 91  | LCRLHAGGKFSNKNYQFSGGLHGVGISVVNALS KRVEVTVRRDGQVYNI AFENG EKVQDLQVVGTGCKRNTGTSVHFWDPTFFDSPRFS  |     |     |     |     |     |     |     | 180 |
| ParE_S.Typhimurium/1-630 | 91  | LCRLHAGGKFSNKNYQFSGGLHGVGISVVNALS KRVEVTVRRDGQVYNI AFENG EKVQDLQVVGTGCKRNTGTSVHFWDPTFFDSPRFS  |     |     |     |     |     |     |     | 180 |
|                          |     | 190                                                                                           | 200 | 210 | 220 | 230 | 240 | 250 | 260 |     |
| ParE_E.coli/1-630        | 181 | VSRLTHVLKAKAVLCPGVEITFKDEINNTEQRWCYQDGLNDYLAEAVNGLPTLPEKPFIGNFAGDTEAVDWALLWLPEGGELLTESYVNL    |     |     |     |     |     |     |     | 270 |
| ParE_S.Typhi/1-630       | 181 | VSRLMHVLKAKAVLCPGVEITFKDEVNNSEQRWCYQDGLNDYLGEAVNGLPTLPEKPFIGNFNGETEAVDWALLWLPEGGELLTESYVNL    |     |     |     |     |     |     |     | 270 |
| ParE_S.Typhimurium/1-630 | 181 | VSRLMHVLKAKAVLCPGVEITFKDEVNNSEQRWCYQDGLNDYLGEAVNGLPTLPEKPFIGNFNGETEAVDWALLWLPEGGELLTESYVNL    |     |     |     |     |     |     |     | 270 |
|                          |     | 280                                                                                           | 290 | 300 | 310 | 320 | 330 | 340 | 350 |     |
| ParE_E.coli/1-630        | 271 | IPTMQGGTHVNGLRQGLLDAMREFCEYRNILPRGVKLSAEDIWDRCAVYLSVKMQDPQFAGQTKERLSSRQCAAFVSGVVKDAFSLWLNQ    |     |     |     |     |     |     |     | 360 |
| ParE_S.Typhi/1-630       | 271 | IPTMQGGTHVNGLRQGLLDAMREFCEYRNILPRGVKLSAEDIWDRCAVYLSVKMQDPQFAGQTKERLSSRQCAAFVSGVVKDAFSLWLNQ    |     |     |     |     |     |     |     | 360 |
| ParE_S.Typhimurium/1-630 | 271 | IPTMQGGTHVNGLRQGLLDAMREFCEYRNILPRGVKLSAEDIWDRCAVYLSVKMQDPQFAGQTKERLSSRQCAAFVSGVVKDAFSLWLNQ    |     |     |     |     |     |     |     | 360 |
|                          |     | 370                                                                                           | 380 | 390 | 400 | 410 | 420 | 430 | 440 |     |
| ParE_E.coli/1-630        | 361 | NVQAAELLAEMAISQAQRRLRAAKKVVRKKLTS GPALPGKLADCTAQDLNRTFLVEQDSAGGS AKQARDREYQAIMPLKIKILNTWEV    |     |     |     |     |     |     |     | 450 |
| ParE_S.Typhi/1-630       | 361 | NVQAAEQLAEMAISQAQRRLRAAKKVVRKKLTS GPALPGKLADCTAQDLNRTFLVEQDSAGGS AKQARDREYQAIMPLKIKILNTWEV    |     |     |     |     |     |     |     | 450 |
| ParE_S.Typhimurium/1-630 | 361 | NVQAAEQLAEMAISQAQRRLRAAKKVVRKKLTS GPALPGKLADCTAQDLNRTFLVEQDSAGGS AKQARDREYQAIMPLKIKILNTWEV    |     |     |     |     |     |     |     | 450 |
|                          |     | 460                                                                                           | 470 | 480 | 490 | 500 | 510 | 520 | 530 |     |
| ParE_E.coli/1-630        | 451 | SSDEVLASQEVHDISVAIGIDPDSDDLSQLRYGKICILADADSDGLHIATLLCALFVKHFRALVKHGHVYVALPPLYRIDLGKEVYYALT    |     |     |     |     |     |     |     | 540 |
| ParE_S.Typhi/1-630       | 451 | SSDEVLASQEVHDISVAIGIDPDSDDLSQLRYGKICILADADSDGLHIATLLCALFVRHFRALVKHGHVYVALPPLYRIDLGKEVYYALT    |     |     |     |     |     |     |     | 540 |
| ParE_S.Typhimurium/1-630 | 451 | SSDEVLASQEVHDISVAIGIDPDSDDLSQLRYGKICILADADSDGLHIATLLCALFVRHFRALVKHGHVYVALPPLYRIDLGKEVYYALT    |     |     |     |     |     |     |     | 540 |
|                          |     | 550                                                                                           | 560 | 570 | 580 | 590 | 600 | 610 | 620 |     |
| ParE_E.coli/1-630        | 541 | EEKEGVLEQLKRKKGKPNVQRFKGLGEMNPMQLRETTLPNTRRLVQLTISDEDDQRTNAMMDMLLAKKRSEDRRNWLQEKGDMAEIEV      |     |     |     |     |     |     |     | 630 |
| ParE_S.Typhi/1-630       | 541 | EEKAGVLEQLKRKKGKPNVQRFKGLGEMNPMQLRETTLPNTRRLVQLTISDEDDQRTNAMMDMLLAKKRSEDRRNWLQEKGDADLDV       |     |     |     |     |     |     |     | 630 |
| ParE_S.Typhimurium/1-630 | 541 | EEKAGVLEQLKRKKGKPNVQRFKGLGEMNPMQLRETTLPNTRRLVQLTISDEDDQRTNAMMDMLLAKKRSEDRRNWLQEKGDADLDV       |     |     |     |     |     |     |     | 630 |

Figure S4: Amino acid sequence alignment for the ParE homologs from *E. coli* (NCBI accession no. AAG58169.1), *S. Typhi* (NCBI accession no. AAO70645.1) and *S. Typhimurium* (NCBI accession no. AAL22055.1). The red box indicates the QRDR (Asp420-Lys441).
